# Supplementary material
Source: publisher figshare collection journal article supplement (https://acs.figshare.com/ndownloader/files/4572067)
Supplement: Supplementary file 1 [file 4572067]

 
data_an681_m_4-APH+.4-HBA-.H2O_2:2:2_(1)

 
_audit_creation_method            SHELXL-97 
_chemical_name_systematic 
; 
 4-Aminopyridinium 4-hydroxybenzoate hydrate 
; 
_chemical_name_common             ? 
_chemical_melting_point           ? 
_chemical_formula_moiety          2(C7H5O3).2(C5H7N2).2(H2O) 
_chemical_formula_sum 
 'C24 H28 N4 O8' 
_chemical_formula_weight          500.5 
 
loop_ 
 _atom_type_symbol 
 _atom_type_description 
 _atom_type_scat_dispersion_real 
 _atom_type_scat_dispersion_imag 
 _atom_type_scat_source 
 'C'  'C'   0.0033   0.0016 
 'International Tables Vol C Tables 4.2.6.8 and 6.1.1.4' 
 'H'  'H'   0.0000   0.0000 
 'International Tables Vol C Tables 4.2.6.8 and 6.1.1.4' 
 'N'  'N'   0.0061   0.0033 
 'International Tables Vol C Tables 4.2.6.8 and 6.1.1.4' 
 'O'  'O'   0.0106   0.0060 
 'International Tables Vol C Tables 4.2.6.8 and 6.1.1.4' 
 
_symmetry_cell_setting            'Triclinic' 
_symmetry_space_group_name_H-M    'P-1   ' 
 
loop_ 
 _symmetry_equiv_pos_as_xyz 
 'x, y, z' 
 '-x, -y, -z' 
 
_cell_length_a                    7.4783(9) 
_cell_length_b                    11.7306(13) 
_cell_length_c                    14.2792(16) 
_cell_angle_alpha                 87.677(2) 
_cell_angle_beta                  77.937(2) 
_cell_angle_gamma                 83.687(2) 
_cell_volume                      1217.4(2) 
_cell_formula_units_Z             2 
_cell_measurement_temperature     298(2) 
_cell_measurement_reflns_used    6749
_cell_measurement_theta_min       ? 
_cell_measurement_theta_max       ? 
 
_exptl_crystal_description        'block'
_exptl_crystal_colour             'colourless'
_exptl_crystal_size_max           0.35 
_exptl_crystal_size_mid           0.28 
_exptl_crystal_size_min           0.22 
_exptl_crystal_density_meas       ? 
_exptl_crystal_density_diffrn     1.365 
_exptl_crystal_density_method     'not measured' 
_exptl_crystal_F_000              528 
_exptl_absorpt_coefficient_mu     0.104 
_exptl_absorpt_correction_type    multi-scan 
_exptl_absorpt_correction_T_min   0.9646 
_exptl_absorpt_correction_T_max   0.9775 
_exptl_absorpt_process_details    
'SADABS-Bruker Nonius area detector scaling and absorption correction - V2.10'
_exptl_special_details 
; 
 ? 
; 
 
_diffrn_ambient_temperature       298(2) 
_diffrn_radiation_wavelength      0.71073 
_diffrn_radiation_type            MoK\a 
_diffrn_radiation_source          'fine-focus sealed tube' 
_diffrn_radiation_monochromator   graphite 
_diffrn_measurement_device_type   'CCD area detector'
_diffrn_measurement_method        'phi and omega scans'
_diffrn_detector_area_resol_mean  ? 
_diffrn_standards_number          ? 
_diffrn_standards_interval_count  ? 
_diffrn_standards_interval_time   ? 
_diffrn_standards_decay_%         ? 
_diffrn_reflns_number             12791 
_diffrn_reflns_av_R_equivalents   0.0211 
_diffrn_reflns_av_sigmaI/netI     0.0243 
_diffrn_reflns_limit_h_min        -9 
_diffrn_reflns_limit_h_max        9 
_diffrn_reflns_limit_k_min        -14 
_diffrn_reflns_limit_k_max        14 
_diffrn_reflns_limit_l_min        -17 
_diffrn_reflns_limit_l_max        17 
_diffrn_reflns_theta_min          1.46 
_diffrn_reflns_theta_max          26.06 
_reflns_number_total              4778 
_reflns_number_gt                 3827 
_reflns_threshold_expression      >2sigma(I) 
 
_computing_data_collection        'Bruker SMART' 
_computing_cell_refinement        'Bruker SMART'
_computing_data_reduction          'Bruker SAINT' 
_computing_structure_solution     'SHELXS-97 (Sheldrick, 1990)' 
_computing_structure_refinement   'SHELXL-97 (Sheldrick, 1997)' 
_computing_molecular_graphics      'Bruker SHELXTL'
_computing_publication_material    'Bruker SHELXTL'
 
_refine_special_details 
; 
 Refinement of F^2^ against ALL reflections.  The weighted R-factor wR and 
 goodness of fit S are based on F^2^, conventional R-factors R are based 
 on F, with F set to zero for negative F^2^. The threshold expression of 
 F^2^ > 2sigma(F^2^) is used only for calculating R-factors(gt) etc. and is 
 not relevant to the choice of reflections for refinement.  R-factors based 
 on F^2^ are statistically about twice as large as those based on F, and R- 
 factors based on ALL data will be even larger. 
; 
 
_refine_ls_structure_factor_coef  Fsqd  
_refine_ls_matrix_type            full 
_refine_ls_weighting_scheme       calc  
_refine_ls_weighting_details 
 'calc w=1/[\s^2^(Fo^2^)+(0.0678P)^2^+0.1764P] where P=(Fo^2^+2Fc^2^)/3' 
_atom_sites_solution_primary      direct 
_atom_sites_solution_secondary    difmap 
_atom_sites_solution_hydrogens    geom 
_refine_ls_hydrogen_treatment     mixed 
_refine_ls_extinction_method      none 
_refine_ls_extinction_coef        ? 
_refine_ls_number_reflns          4778 
_refine_ls_number_parameters      373 
_refine_ls_number_restraints      0 
_refine_ls_R_factor_all           0.0582 
_refine_ls_R_factor_gt            0.0468 
_refine_ls_wR_factor_ref          0.1255 
_refine_ls_wR_factor_gt           0.1174 
_refine_ls_goodness_of_fit_ref    1.043 
_refine_ls_restrained_S_all       1.043 
_refine_ls_shift/su_max           0.000 
_refine_ls_shift/su_mean          0.000 
 
loop_ 
 _atom_site_label 
 _atom_site_type_symbol 
 _atom_site_fract_x 
 _atom_site_fract_y 
 _atom_site_fract_z 
 _atom_site_U_iso_or_equiv 
 _atom_site_adp_type 
 _atom_site_occupancy 
 _atom_site_symmetry_multiplicity 
 _atom_site_calc_flag 
 _atom_site_refinement_flags 
 _atom_site_disorder_assembly 
 _atom_site_disorder_group 
O6 O 1.08743(17) 0.19538(10) 0.08203(8) 0.0522(3) Uani 1 1 d . . . 
C12 C 1.0260(2) 0.19321(12) 0.17811(10) 0.0404(3) Uani 1 1 d . . . 
O5 O 0.7292(2) 0.08991(12) 0.51420(9) 0.0809(5) Uani 1 1 d . . . 
C13 C 0.9336(2) 0.10129(13) 0.21843(11) 0.0452(4) Uani 1 1 d . . . 
H13 H 0.9161 0.0435 0.1795 0.054 Uiso 1 1 calc R . . 
N1 N 0.2945(2) -0.00457(15) 0.96653(10) 0.0522(4) Uani 1 1 d . . . 
O4 O 0.8432(2) 0.25074(11) 0.53263(9) 0.0705(4) Uani 1 1 d . . . 
C17 C 0.3977(2) 0.02026(13) 0.88186(10) 0.0410(3) Uani 1 1 d . . . 
N2 N 0.5977(2) 0.06729(13) 0.70188(10) 0.0528(4) Uani 1 1 d . . . 
C9 C 0.8935(2) 0.17944(12) 0.37577(11) 0.0427(4) Uani 1 1 d . . . 
C14 C 0.8675(2) 0.09503(13) 0.31581(11) 0.0464(4) Uani 1 1 d . . . 
H14 H 0.8045 0.0333 0.3419 0.056 Uiso 1 1 calc R . . 
C11 C 1.0531(2) 0.27831(13) 0.23725(11) 0.0450(4) Uani 1 1 d . . . 
H11 H 1.1152 0.3404 0.2111 0.054 Uiso 1 1 calc R . . 
C10 C 0.9878(2) 0.27042(13) 0.33463(11) 0.0454(4) Uani 1 1 d . . . 
H10 H 1.0073 0.3274 0.3737 0.055 Uiso 1 1 calc R . . 
C15 C 0.6113(2) -0.03933(15) 0.73885(12) 0.0509(4) Uani 1 1 d . . . 
H15 H 0.6877 -0.0969 0.7030 0.061 Uiso 1 1 calc R . . 
C8 C 0.8191(2) 0.17392(14) 0.48213(12) 0.0514(4) Uani 1 1 d . . . 
C18 C 0.3907(2) 0.13174(14) 0.84166(12) 0.0494(4) Uani 1 1 d . . . 
H18 H 0.3183 0.1919 0.8761 0.059 Uiso 1 1 calc R . . 
C16 C 0.5164(2) -0.06501(13) 0.82715(11) 0.0475(4) Uani 1 1 d . . . 
H16 H 0.5297 -0.1393 0.8518 0.057 Uiso 1 1 calc R . . 
C19 C 0.4892(2) 0.15119(15) 0.75313(13) 0.0552(4) Uani 1 1 d . . . 
H19 H 0.4817 0.2250 0.7269 0.066 Uiso 1 1 calc R . . 
O2 O 0.33873(17) 0.75020(10) -0.00214(9) 0.0604(3) Uani 1 1 d . . . 
O1 O 0.24591(19) 0.58289(10) -0.02445(9) 0.0652(4) Uani 1 1 d . . . 
O3 O -0.23095(19) 0.68521(11) 0.38845(9) 0.0646(4) Uani 1 1 d . . . 
C5 C -0.1185(2) 0.68720(13) 0.30039(11) 0.0459(4) Uani 1 1 d . . . 
C3 C 0.0976(2) 0.77236(13) 0.17775(11) 0.0437(4) Uani 1 1 d . . . 
H3 H 0.1686 0.8322 0.1564 0.052 Uiso 1 1 calc R . . 
C2 C 0.1049(2) 0.68066(12) 0.11796(11) 0.0409(3) Uani 1 1 d . . . 
N4 N 0.5499(2) 0.42425(12) 0.20033(10) 0.0511(4) Uani 1 1 d . . . 
C6 C -0.1135(2) 0.59577(13) 0.24155(12) 0.0488(4) Uani 1 1 d . . . 
H6 H -0.1844 0.5359 0.2632 0.059 Uiso 1 1 calc R . . 
C7 C -0.0041(2) 0.59282(13) 0.15098(11) 0.0459(4) Uani 1 1 d . . . 
H7 H -0.0031 0.5315 0.1116 0.055 Uiso 1 1 calc R . . 
C1 C 0.2376(2) 0.67227(13) 0.02352(11) 0.0457(4) Uani 1 1 d . . . 
C4 C -0.0130(2) 0.77634(13) 0.26819(11) 0.0461(4) Uani 1 1 d . . . 
H4 H -0.0166 0.8384 0.3073 0.055 Uiso 1 1 calc R . . 
C22 C 0.3489(2) 0.47776(14) 0.38066(11) 0.0472(4) Uani 1 1 d . . . 
N3 N 0.2517(3) 0.50539(17) 0.46731(12) 0.0726(5) Uani 1 1 d . . . 
C21 C 0.3533(2) 0.55663(14) 0.30400(12) 0.0506(4) Uani 1 1 d . . . 
H21 H 0.2873 0.6287 0.3132 0.061 Uiso 1 1 calc R . . 
C23 C 0.4501(3) 0.37003(14) 0.36106(13) 0.0558(4) Uani 1 1 d . . . 
H23 H 0.4500 0.3147 0.4096 0.067 Uiso 1 1 calc R . . 
C24 C 0.5472(2) 0.34700(15) 0.27208(13) 0.0539(4) Uani 1 1 d . . . 
H24 H 0.6141 0.2756 0.2602 0.065 Uiso 1 1 calc R . . 
C20 C 0.4536(2) 0.52745(15) 0.21681(12) 0.0546(4) Uani 1 1 d . . . 
H20 H 0.4562 0.5805 0.1665 0.066 Uiso 1 1 calc R . . 
O8 O 0.3013(2) 0.35328(14) 0.02057(13) 0.0756(5) Uani 1 1 d . . . 
O7 O 0.3344(3) 0.12896(15) 0.50735(13) 0.0956(6) Uani 1 1 d . . . 
H7B H 0.2088(19) 0.1591(11) 0.5036(10) 0.019(3) Uiso 1 1 d . . . 
H8B H 0.409(4) 0.330(2) 0.0182(18) 0.086(8) Uiso 1 1 d . . . 
H8A H 0.288(3) 0.422(2) 0.0138(17) 0.084(8) Uiso 1 1 d . . . 
H2 H 0.652(3) 0.0802(17) 0.6384(16) 0.073(6) Uiso 1 1 d . . . 
H3B H 0.204(3) 0.577(2) 0.4755(18) 0.097(8) Uiso 1 1 d . . . 
H1A H 0.299(3) -0.0741(19) 0.9857(15) 0.068(6) Uiso 1 1 d . . . 
H3C H -0.241(3) 0.754(2) 0.4166(17) 0.092(8) Uiso 1 1 d . . . 
H1B H 0.222(3) 0.0528(18) 1.0017(15) 0.069(6) Uiso 1 1 d . . . 
H6A H 1.145(3) 0.257(2) 0.0624(17) 0.087(7) Uiso 1 1 d . . . 
H4A H 0.624(3) 0.4112(17) 0.1342(16) 0.074(6) Uiso 1 1 d . . . 
H3A H 0.251(3) 0.4577(18) 0.5147(16) 0.068(6) Uiso 1 1 d . . . 
H7A H 0.294(4) 0.050(3) 0.508(2) 0.142(12) Uiso 1 1 d . . . 
 
loop_ 
 _atom_site_aniso_label 
 _atom_site_aniso_U_11 
 _atom_site_aniso_U_22 
 _atom_site_aniso_U_33 
 _atom_site_aniso_U_23 
 _atom_site_aniso_U_13 
 _atom_site_aniso_U_12 
O6 0.0650(8) 0.0518(7) 0.0340(6) -0.0009(5) 0.0045(5) -0.0089(6) 
C12 0.0405(8) 0.0412(8) 0.0346(8) -0.0006(6) 0.0010(6) 0.0000(6) 
O5 0.1222(13) 0.0613(8) 0.0454(7) -0.0022(6) 0.0246(8) -0.0287(8) 
C13 0.0508(9) 0.0408(8) 0.0415(9) -0.0071(6) -0.0008(7) -0.0081(7) 
N1 0.0631(9) 0.0489(9) 0.0381(8) -0.0019(7) 0.0050(7) -0.0070(7) 
O4 0.1080(11) 0.0581(8) 0.0407(7) -0.0085(6) -0.0029(7) -0.0099(7) 
C17 0.0430(8) 0.0462(8) 0.0336(8) -0.0023(6) -0.0057(6) -0.0069(7) 
N2 0.0580(9) 0.0590(9) 0.0360(8) 0.0066(6) 0.0017(6) -0.0070(7) 
C9 0.0486(9) 0.0363(8) 0.0370(8) -0.0024(6) 0.0028(7) 0.0006(6) 
C14 0.0525(9) 0.0384(8) 0.0431(9) 0.0011(6) 0.0044(7) -0.0095(7) 
C11 0.0499(9) 0.0359(8) 0.0440(9) 0.0000(6) 0.0038(7) -0.0085(7) 
C10 0.0537(9) 0.0378(8) 0.0408(9) -0.0076(6) 0.0008(7) -0.0048(7) 
C15 0.0545(10) 0.0525(10) 0.0396(9) -0.0023(7) 0.0005(7) 0.0025(8) 
C8 0.0632(11) 0.0422(9) 0.0395(9) -0.0011(7) 0.0062(8) 0.0028(8) 
C18 0.0547(10) 0.0420(8) 0.0474(9) -0.0036(7) -0.0029(7) -0.0011(7) 
C16 0.0552(9) 0.0416(8) 0.0416(9) 0.0017(7) -0.0037(7) 0.0005(7) 
C19 0.0637(11) 0.0455(9) 0.0521(10) 0.0096(8) -0.0047(8) -0.0044(8) 
O2 0.0614(8) 0.0498(7) 0.0586(8) 0.0024(6) 0.0146(6) -0.0085(6) 
O1 0.0906(10) 0.0475(7) 0.0441(7) -0.0063(5) 0.0173(6) -0.0070(6) 
O3 0.0853(9) 0.0504(7) 0.0438(7) -0.0016(6) 0.0198(6) -0.0077(6) 
C5 0.0518(9) 0.0414(8) 0.0365(8) 0.0028(6) 0.0044(7) 0.0024(7) 
C3 0.0488(9) 0.0358(8) 0.0430(9) 0.0039(6) -0.0023(7) -0.0051(6) 
C2 0.0439(8) 0.0377(8) 0.0366(8) 0.0022(6) -0.0018(6) 0.0015(6) 
N4 0.0529(8) 0.0596(9) 0.0364(8) -0.0090(6) 0.0009(6) -0.0025(7) 
C6 0.0523(9) 0.0398(8) 0.0487(9) 0.0007(7) 0.0045(7) -0.0091(7) 
C7 0.0537(9) 0.0387(8) 0.0415(9) -0.0049(6) -0.0011(7) -0.0039(7) 
C1 0.0534(9) 0.0388(8) 0.0383(8) 0.0039(7) 0.0011(7) 0.0023(7) 
C4 0.0583(10) 0.0361(8) 0.0398(8) -0.0043(6) -0.0024(7) -0.0005(7) 
C22 0.0515(9) 0.0454(9) 0.0390(9) -0.0013(7) 0.0039(7) -0.0054(7) 
N3 0.1002(14) 0.0551(10) 0.0436(9) 0.0034(8) 0.0203(9) 0.0059(9) 
C21 0.0546(10) 0.0459(9) 0.0444(9) 0.0026(7) -0.0001(7) 0.0048(7) 
C23 0.0710(11) 0.0423(9) 0.0464(10) 0.0052(7) 0.0011(8) -0.0008(8) 
C24 0.0584(10) 0.0440(9) 0.0537(10) -0.0073(7) -0.0004(8) 0.0007(7) 
C20 0.0602(11) 0.0600(10) 0.0379(9) 0.0073(7) -0.0035(8) 0.0026(8) 
O8 0.0615(10) 0.0542(9) 0.1002(12) 0.0153(8) 0.0056(8) -0.0076(7) 
O7 0.1305(17) 0.0626(10) 0.0812(11) -0.0114(8) 0.0115(11) -0.0162(11) 
 
_geom_special_details 
; 
 All esds (except the esd in the dihedral angle between two l.s. planes) 
 are estimated using the full covariance matrix.  The cell esds are taken 
 into account individually in the estimation of esds in distances, angles 
 and torsion angles; correlations between esds in cell parameters are only 
 used when they are defined by crystal symmetry.  An approximate (isotropic) 
 treatment of cell esds is used for estimating esds involving l.s. planes. 
; 
 
loop_ 
 _geom_bond_atom_site_label_1 
 _geom_bond_atom_site_label_2 
 _geom_bond_distance 
 _geom_bond_site_symmetry_2 
 _geom_bond_publ_flag 
O6 C12 1.3528(18) . ? 
C12 C13 1.385(2) . ? 
C12 C11 1.391(2) . ? 
O5 C8 1.270(2) . ? 
C13 C14 1.377(2) . ? 
N1 C17 1.331(2) . ? 
O4 C8 1.228(2) . ? 
C17 C16 1.406(2) . ? 
C17 C18 1.407(2) . ? 
N2 C15 1.339(2) . ? 
N2 C19 1.340(2) . ? 
C9 C10 1.387(2) . ? 
C9 C14 1.390(2) . ? 
C9 C8 1.506(2) . ? 
C11 C10 1.377(2) . ? 
C15 C16 1.351(2) . ? 
C18 C19 1.348(2) . ? 
O2 C1 1.2455(19) . ? 
O1 C1 1.2643(19) . ? 
O3 C5 1.3596(19) . ? 
C5 C6 1.382(2) . ? 
C5 C4 1.385(2) . ? 
C3 C4 1.380(2) . ? 
C3 C2 1.390(2) . ? 
C2 C7 1.390(2) . ? 
C2 C1 1.498(2) . ? 
N4 C24 1.338(2) . ? 
N4 C20 1.342(2) . ? 
C6 C7 1.378(2) . ? 
C22 N3 1.330(2) . ? 
C22 C21 1.402(2) . ? 
C22 C23 1.406(2) . ? 
C21 C20 1.348(2) . ? 
C23 C24 1.347(2) . ? 
 
loop_ 
 _geom_angle_atom_site_label_1 
 _geom_angle_atom_site_label_2 
 _geom_angle_atom_site_label_3 
 _geom_angle 
 _geom_angle_site_symmetry_1 
 _geom_angle_site_symmetry_3 
 _geom_angle_publ_flag 
O6 C12 C13 117.91(14) . . ? 
O6 C12 C11 122.84(14) . . ? 
C13 C12 C11 119.24(14) . . ? 
C14 C13 C12 120.32(14) . . ? 
N1 C17 C16 121.25(15) . . ? 
N1 C17 C18 122.04(15) . . ? 
C16 C17 C18 116.69(14) . . ? 
C15 N2 C19 119.89(14) . . ? 
C10 C9 C14 118.05(14) . . ? 
C10 C9 C8 120.65(14) . . ? 
C14 C9 C8 121.29(14) . . ? 
C13 C14 C9 121.07(14) . . ? 
C10 C11 C12 119.83(14) . . ? 
C11 C10 C9 121.48(14) . . ? 
N2 C15 C16 121.37(15) . . ? 
O4 C8 O5 123.53(16) . . ? 
O4 C8 C9 119.38(15) . . ? 
O5 C8 C9 117.06(15) . . ? 
C19 C18 C17 119.83(15) . . ? 
C15 C16 C17 120.24(15) . . ? 
N2 C19 C18 121.92(16) . . ? 
O3 C5 C6 117.26(14) . . ? 
O3 C5 C4 122.90(15) . . ? 
C6 C5 C4 119.84(14) . . ? 
C4 C3 C2 121.28(14) . . ? 
C3 C2 C7 118.35(14) . . ? 
C3 C2 C1 120.73(14) . . ? 
C7 C2 C1 120.76(14) . . ? 
C24 N4 C20 119.55(14) . . ? 
C7 C6 C5 120.32(14) . . ? 
C6 C7 C2 120.66(14) . . ? 
O2 C1 O1 123.29(15) . . ? 
O2 C1 C2 119.14(14) . . ? 
O1 C1 C2 117.50(14) . . ? 
C3 C4 C5 119.54(14) . . ? 
N3 C22 C21 120.44(16) . . ? 
N3 C22 C23 122.56(17) . . ? 
C21 C22 C23 117.00(15) . . ? 
C20 C21 C22 119.63(16) . . ? 
C24 C23 C22 120.03(16) . . ? 
N4 C24 C23 121.71(16) . . ? 
N4 C20 C21 122.08(16) . . ? 
 
_diffrn_measured_fraction_theta_max    0.992 
_diffrn_reflns_theta_full              26.06 
_diffrn_measured_fraction_theta_full   0.992 
_refine_diff_density_max    0.367 
_refine_diff_density_min   -0.305 
_refine_diff_density_rms    0.083 
